# Supplementary material for: Congenital Hepatic Fibrosis in Children and Adults: Clinical Manifestations, Management, and Outcome—Case Series and Literature Review
Source: Hindawi journal article supplement (doi:10.1155/2020/8284274), 2020-04-21
Supplement: f1 [file 8284274.f1.pdf]

## Supplementary Materials

**Supplementary Table S1** Complications involved in portal hypertension and other imaging findings

| No. | EGVB | hepatomegaly | splenomegaly | lymphadenectasis | Serous cavity effusion |
|-----|------|--------------|--------------|------------------|------------------------|
| P1  |      | +            | +            | +                |                        |
| P2  | +    | +            | +            |                  |                        |
| P3  | +    |              | +            |                  | + ( ascites )          |
| P4  | +    |              | +            | +                | +(polyserositis)       |
| P5  |      |              | +            |                  |                        |
| P6  |      |              | +            |                  |                        |
| P7  |      |              | +            |                  |                        |
| P8  |      |              | +            |                  |                        |

**Supplementary Table S2** Autosomal recessive inherited syndromes related with CHF

| CHF associated AR syndrome                                                | Clinical features                                                                                                                                                                                          | Mutated genes                                                                                                                                                             |
|---------------------------------------------------------------------------|------------------------------------------------------------------------------------------------------------------------------------------------------------------------------------------------------------|---------------------------------------------------------------------------------------------------------------------------------------------------------------------------|
| Caroli's syndrome                                                         | Caroli's disease, congenital hepatic fibrosis                                                                                                                                                              | <i>PKHD1</i>                                                                                                                                                              |
| ARPKD                                                                     | Renal cysts, hepatic fibrosis, pulmonary hypoplasia, systemic hypertension                                                                                                                                 | <i>PKHD1</i>                                                                                                                                                              |
| Nephronophthisis(NPHP)                                                    | cerebello-ocular-renal syndromes, liver fibrosis, skeletal defects, scoliosis, cleft palate, situs inversus                                                                                                | <i>NPHP1, INVS, NPHP3, NPHP4, IQCB1, CEP290, GLIS2, RPGRIP1L, NEK8, TMEM67, TTC21B, WDR19, ZNF423, CEP164, ANKS6</i>                                                      |
| Meckel syndrome(MKS)                                                      | renal cystic disease, occipital encephalocele, polydactyly, fibrotic/cystic changes of the liver, orofacial clefts                                                                                         | <i>MKS1, TMEM216, TMEM67, CEP290, RPGRIP1L, CC2D2A, NPHP3, TCTN2, B9D1, B9D2, TMEM231, KIF14</i>                                                                          |
| Joubert syndrome and related disorders(JSRD, e.g., COACH, Arima syndrome) | Cerebellar vermis hypoplasia(molar tooth sign, MTS), episodic tachypnea or apnea, ocular motor apraxia, retinitis pigmentosa, ataxia, oligophrenia, renal abnormalities, coloboma, psychomotor retardation | <i>INPP5E, TMEM216, AH11, NPHP1, CEP290, TMEM67, RPGRIP1L, ARL13B, CC2D2A, OFD1, TTC21B, KIF7, TCTN1, TMEM237, CEP41, TMEM138, C5orf42, TCTN3, ZNF423, TMEM231, TCTN2</i> |
| Bardet–Biedl syndrome(BBS)                                                | retinitis pigmentosa, polydactyly, mental retardation, hypogonadism, renal dysfunction                                                                                                                     | <i>BBS1, BBS2, ARL6, BBS4, BBS5, MKKS, BBS7, TTC8, BBS9, BBS10, TRIM32, BBS12, MKS1, CEP290</i>                                                                           |
| Jeune asphyxiating thoracic dystrophy (Jeune Syndrome, JATD)              | Small/narrow chest, shortened bones of the arms and legs, cone shaped epiphyses, renal dysfunction, liver disease                                                                                          | <i>IFT80, IFT140</i>                                                                                                                                                      |
| Cranioectodermal dysplasia                                                | bone abnormalities, dysplasia of ectodermal tissues, nephronophthisis                                                                                                                                      | <i>WDR35, IFT122, WDR19, IFT43</i>                                                                                                                                        |
| Ellis-van Creveld syndrome                                                | abnormal bone growth, congenital heart disease, postaxial polydactyly, dystrophic nails and teeth, retinal degeneration.                                                                                   | <i>EVC, EVC2</i>                                                                                                                                                          |
| Renal-hepatic-pancreatic dysplasia(RHPD)                                  | renal dysplasia, pancreatic fibrosis, hepatic dysgenesis                                                                                                                                                   | <i>NPHP3</i>                                                                                                                                                              |

---

Ivemark syndrome

asplenia, heart malformations, abnormal lung  
lobation, localized renal dysplasia

*unidentified*

---

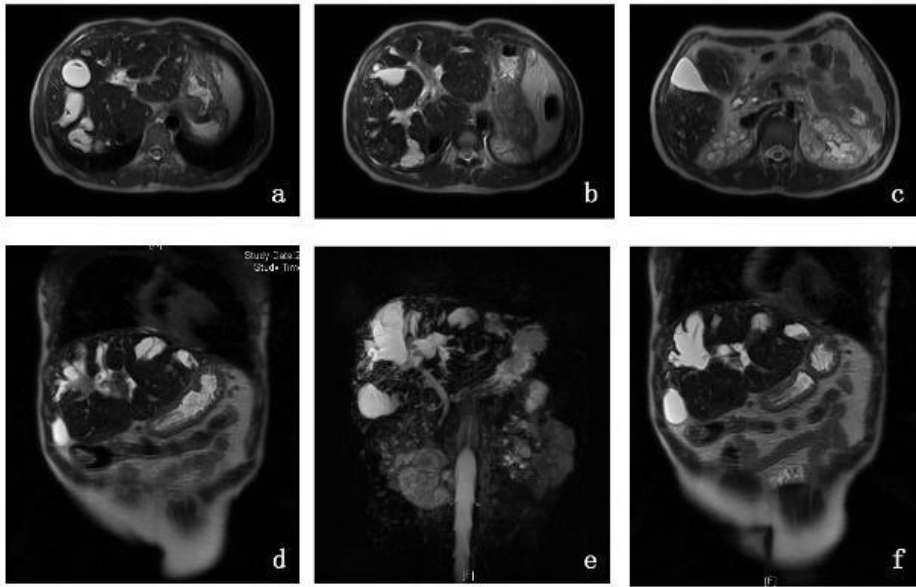

**Supplementary Figure S1:** Magnetic Resonance Cholangiopancreatography (MRCP) of P7 showed cystic and columnar expansion of intrahepatic bile ducts indicating a probability of congenital dysplasia (coronal plane a~c, sagittal plane d~f).
